# Supplementary material
Source: HighWire-hosted journal article supplement (https://bmjopen.bmj.com/content/14/10/e089738)
Supplement: inline-supplementary-material-1 [file inline-supplementary-material-1.pdf]

Supplementary Table 1. Baseline characteristics and KAP scores

| Variables                              | N (%)       | Knowledge score |        | Attitudes score |       |
|----------------------------------------|-------------|-----------------|--------|-----------------|-------|
|                                        |             | Mean ± SD       | P      | Mean ± SD       | P     |
| <b>Total</b>                           | 246         | 12.46 ± 6.21    |        | 30.00 ± 2.58    |       |
| <b>Age</b>                             |             |                 | 0.004  |                 | 0.020 |
| <50 years                              | 107 (43.50) | 13.77 ± 6.14    |        | 29.56 ± 2.55    |       |
| ≥50 years                              | 139 (56.50) | 11.45 ± 6.10    |        | 30.33 ± 2.57    |       |
| <b>Residence</b>                       |             |                 | 0.008  |                 | 0.021 |
| Rural                                  | 136 (55.28) | 11.52 ± 6.46    |        | 30.34 ± 2.75    |       |
| Urban                                  | 110 (44.72) | 13.62 ± 5.72    |        | 29.57 ± 2.31    |       |
| <b>Education</b>                       |             |                 | <0.001 |                 | 0.024 |
| Middle school and below                | 142 (57.72) | 11.53 ± 6.40    |        | 30.30 ± 2.69    |       |
| High school/Technical secondary school | 53 (21.54)  | 11.45 ± 5.13    |        | 29.98 ± 2.45    |       |
| Junior college and above               | 51 (20.73)  | 16.10 ± 5.42    |        | 29.16 ± 2.27    |       |

|                            |            |         |         |       |
|----------------------------|------------|---------|---------|-------|
| Marital status             |            |         | 0.282   | 0.145 |
| Married                    | 213        | 12.29 ± | 29.90 ± |       |
|                            | (86.59)    | 6.21    | 2.63    |       |
| Unmarried/Divorced/Widowed |            | 13.55 ± | 30.61 ± |       |
|                            | 33 (13.41) | 6.20    | 2.24    |       |
| Smoking                    |            |         | 0.600   | 0.656 |
| Yes                        |            | 14.33 ± | 29.33 ± |       |
|                            | 3 (1.22)   | 4.04    | 2.08    |       |
| No                         | 243        | 12.44 ± | 30.00 ± |       |
|                            | (98.78)    | 6.24    | 2.59    |       |
| Drinking                   |            |         | 0.632   | 0.389 |
| Yes                        |            | 11.93 ± | 30.39 ± |       |
|                            | 28 (11.38) | 4.86    | 1.83    |       |
| No                         | 218        | 12.53 ± | 29.94 ± |       |
|                            | (88.62)    | 6.37    | 2.67    |       |
| Childbirth                 |            |         | 0.918   | 0.797 |
| Yes                        | 222        | 12.45 ± | 29.98 ± |       |
|                            | (90.24)    | 6.20    | 2.61    |       |
| No                         |            | 12.58 ± | 30.13 ± |       |
|                            | 24 (9.76)  | 6.45    | 2.36    |       |
| Menopause                  |            |         | 0.779   | 0.537 |
| Yes                        | 130        | 12.35 ± | 30.09 ± |       |

|                                                         |            |             |         |
|---------------------------------------------------------|------------|-------------|---------|
|                                                         | (52.85)    | 6.59        | 2.68    |
| No                                                      | 116        | 12.58 ±     | 29.89 ± |
|                                                         | (47.15)    | 5.79        | 2.48    |
| Duration of breast cancer                               |            | 0.145       | 0.317   |
| <3 years                                                | 207        | 12.71 ±     | 30.07 ± |
|                                                         | (84.15)    | 6.06        | 2.48    |
| ≥3 years                                                |            | 11.13 ±     | 29.62 ± |
|                                                         | 39 (15.85) | 6.91        | 3.08    |
| Duration of chemotherapy for breast cancer              |            | 0.851       | 0.825   |
| <6 months                                               | 190        | 12.50 ±     | 30.02 ± |
|                                                         | (77.24)    | 6.13        | 2.55    |
| ≥6 months                                               |            | 12.32 ±     | 29.93 ± |
|                                                         | 56 (22.76) | 6.57        | 2.72    |
| Chemotherapy-related neutropenia or febrile neutropenia |            | <0.001      | 0.099   |
| Yes                                                     |            | 13.55 ±     | 30.29 ± |
|                                                         | 92 (37.40) | 5.18        | 2.33    |
| No                                                      |            | 13.65 ±     | 29.56 ± |
|                                                         | 98 (39.84) | 6.54        | 2.56    |
| Unclear                                                 | 56 (22.76) | 8.57 ± 5.69 | 30.27 ± |

|                               |            |         |         |       |
|-------------------------------|------------|---------|---------|-------|
|                               |            |         | 2.93    |       |
| Chemotherapy drugs have been  |            |         | 0.015   | 0.388 |
| adjusted                      |            |         |         |       |
| Yes                           |            | 17.38 ± | 31.38 ± |       |
|                               | 8 (8.70)   | 4.69    | 3.38    |       |
| No                            |            | 13.75 ± | 30.22 ± |       |
|                               | 65 (70.65) | 4.73    | 2.12    |       |
| Unclear                       |            | 11.26 ± | 30.11 ± |       |
|                               | 19 (20.65) | 5.93    | 2.56    |       |
| Chemotherapy has been delayed |            |         | 0.210   | 0.174 |
| Yes                           |            | 13.38 ± | 30.42 ± |       |
|                               | 48 (52.17) | 4.10    | 2.05    |       |
| No                            |            | 14.39 ± | 29.86 ± |       |
|                               | 36 (39.13) | 6.44    | 2.64    |       |
| Unclear                       |            | 10.88 ± | 31.50 ± |       |
|                               | 8 (8.70)   | 4.02    | 2.20    |       |

|                                                                                                                                         | N (%)       |
|-----------------------------------------------------------------------------------------------------------------------------------------|-------------|
| 1. Do you know about neutropenia, a common side effect after chemotherapy that increases the risk of infection?                         | 56 (22.76)  |
| 2. Do you know that NE is a type of white blood cell?                                                                                   | 122 (49.59) |
| 3. Do you know that neutropenia can be detected by routine blood tests?                                                                 | 163 (66.26) |
| 4. Do you know that an absolute NE count of less than 2.0x10 <sup>9</sup> /L on a routine blood report means neutropenia?               | 50 (20.33)  |
| 5. Do you know that high chemotherapy doses and the combination of different chemotherapy drugs can cause neutropenia?                  | 44 (17.89)  |
| 6. Do you know that advanced age and underlying diseases (e.g., hypertension, coronary heart disease) increase the risk of neutropenia? | 34 (13.82)  |
| 7. Do you know that neutropenia often causes fever?                                                                                     | 59 (23.98)  |
| 8. Do you know that your temperature needs to be measured routinely for 7-14 days after chemotherapy?                                   | 121 (49.19) |
| 9. Do you understand that the risk of FN needs to be reassessed before the beginning of each chemotherapy cycle?                        | 55 (22.36)  |
| 10. Do you know that severe neutropenia may require adjustment of chemotherapy drugs or discontinuation of medication?                  | 50 (20.33)  |
| 11. Do you know what drugs are needed to treat neutropenia?                                                                             | 99 (40.24)  |
| 12. Do you know about the primary prevention measures for FN?                                                                           | 25 (10.16)  |
| 13. Do you know about the need for prophylactic administration of leukocyte-raising agents in chemotherapy patients at high risk of FN? | 99 (40.24)  |

Supplementary Table 3. Attitude toward chemotherapy-related neutropenia and febrile neutropenia

|                                                                                                                               | Strongly<br>agree | Agree       | No matter  | Disagree   | Strongly<br>disagree |
|-------------------------------------------------------------------------------------------------------------------------------|-------------------|-------------|------------|------------|----------------------|
| 1. I would be very anxious if neutropenia was screened.                                                                       | 33 (13.41)        | 143 (58.13) | 45 (18.29) | 22 (8.94)  | 3 (1.22)             |
| 2. I think regular check-ups should be performed during chemotherapy.                                                         | 125 (50.81)       | 118 (47.97) | 2 (0.81)   | 0 (0)      | 1 (0.41)             |
| 3. I think that I should seek medical attention as soon as I develop a fever.                                                 | 108 (43.9)        | 130 (52.85) | 5 (2.03)   | 2 (0.81)   | 1 (0.41)             |
| 4. I think that the high cost of treatment and prevention of neutropenia places a financial burden on me.                     | 44 (17.89)        | 102 (41.46) | 71 (28.86) | 26 (10.57) | 3 (1.22)             |
| 5. I think it is necessary to follow medical advice to adjust medication and treat actively when neutropenia or fever occurs. | 139 (56.5)        | 105 (42.68) | 2 (0.81)   | 0 (0)      | 0 (0)                |
| 6. I think I need to be proactive in learning about chemotherapy-related neutropenia and febrile neutropenia.                 | 142 (57.72)       | 95 (38.62)  | 8 (3.25)   | 1 (0.41)   | 0 (0)                |
| 7. I think it is important to eat properly, sleep regularly, and keep a good mood in daily life.                              | 160 (65.04)       | 85 (34.55)  | 1 (0.41)   | 0 (0)      | 0 (0)                |

| Supplementary Table 4. Practice toward chemotherapy-related neutropenia and febrile neutropenia                                                                                                  |             |              |            |
|--------------------------------------------------------------------------------------------------------------------------------------------------------------------------------------------------|-------------|--------------|------------|
|                                                                                                                                                                                                  | Informed    | Not informed | Unknown    |
| 1. Has your attending physician informed you about if the chemotherapy protocol you were prescribed was a high-risk protocol for febrile neutropenia?                                            | 113 (45.93) | 86 (34.96)   | 47 (19.11) |
| 2. Has your attending physician informed you that the high-risk chemotherapy protocol requires the prophylactic administration of leukocyte-raising agents?                                      | 196 (79.67) | 25 (10.16)   | 25 (10.16) |
| 3.Has your attending physician informed you of the need for prophylactic administration of leukocyte-raising agents for subsequent chemotherapy if you have had febrile neutropenia in the past? | 195 (79.27) | 18 (7.32)    | 33 (13.41) |
| 4.Has your attending physician informed you that the risk of febrile neutropenia should be assessed at each chemotherapy cycle?                                                                  | 90 (36.59)  | 78 (31.71)   | 78 (31.71) |
